# Supplementary material for: Discrimination of the Geographical Origin of the Lateral Roots of Aconitum carmichaelii Using the Fingerprint, Multicomponent Quantification, and Chemometric Methods
Source: PubMed Central journal article supplement (PMC6891363; doi:10.3390/molecules24224124), 2019-11-14
Supplement: molecules-24-04124-s001.pdf [file molecules-24-04124-s001.pdf]

# Supplementary Material

## Discrimination of the geographical origin of the lateral roots of *Aconitum carmichaelii* using fingerprint, multicomponent quantification, and chemometric methods

Lu-Lin Miao <sup>1,2,3,†</sup>, Qin-Mei Zhou <sup>1,2,3,†</sup>, Cheng Peng <sup>1,2,\*</sup>, Chun-Wang Meng <sup>1,2,3</sup>, Xiao-Ya Wang <sup>1,2,3</sup> and Liang Xiong <sup>1,2,3,\*</sup>

<sup>1</sup> School of Pharmacy, Chengdu University of Traditional Chinese Medicine, Chengdu 611137, China; 18408210835@163.com (L.L.M.); zhqmyx@sina.cn (Q.M.Z.); mengchunw@126.com (C.W.M.); 18234447532@163.com (X.Y.W.)

<sup>2</sup> State Key Laboratory Breeding Base of Systematic Research, Development and Utilization of Chinese Medicine Resources, Chengdu University of Traditional Chinese Medicine, Chengdu 611137, China

<sup>3</sup> Institute of Innovative Medicine Ingredients of Southwest Specialty Medicinal Materials, Chengdu University of Traditional Chinese Medicine, Chengdu 611137, China

\* Correspondence: pengchengchengdu@126.com (C.P.); xiling0505@126.com (L.X.)

† These authors contributed equally to this work.

## The List of Contents

| No | Content                                                                                          | Page |
|----|--------------------------------------------------------------------------------------------------|------|
| 1  | Optimization Process of the Extraction Conditions                                                | S1   |
| 2  | <b>Table S1.</b> Six representative alkaloids contents of Fuzi from Jiangyou, Butuo, and Yunnan  | S3   |
| 3  | <b>Table S2.</b> Similarity results of HPLC fingerprint of Fuzi from Jiangyou, Butuo, and Yunnan | S4   |

### Optimization Process of the Extraction Conditions.

**Study on extraction solvent.** Different extraction solvents (dichloromethane, ethyl acetate, methanol, and *v/v* 1:1 mixed solution of isopropanol-ethyl acetate) were used to extract the same batch of Fuzi. All operations were the same except for the extraction solvent. The extract was determined with the chromatographic conditions of Fuzi in Chinese Pharmacopoeia. Comparing the peaks of each group, the extraction rate of isopropanol-ethyl acetate mixed solution (*v/v* 1:1) was higher, and the chromatographic peaks were more abundant. Thus, isopropanol-ethyl acetate mixed solution (*v/v* 1:1) was selected as the extraction solvent in the following study.

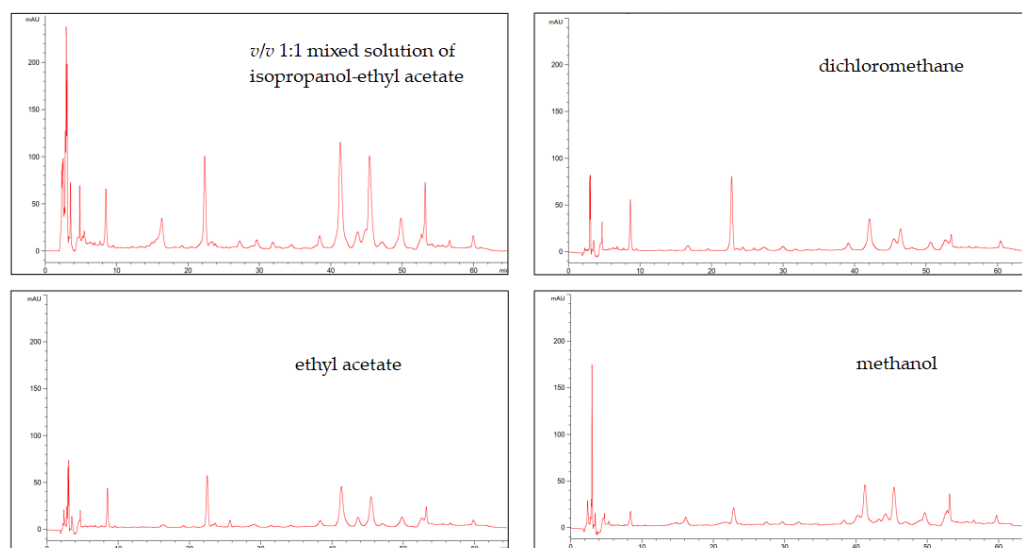

Figure S1. Chromatograms of different extraction solvents.

**Study on extraction time.** The same batch of Fuzi were extracted in different extraction times (20 min, 30 min, and 40 min). All operations were the same except for the extraction time. Thirty minutes was chosen for ultrasonic extraction according to the chromatographic peak area.

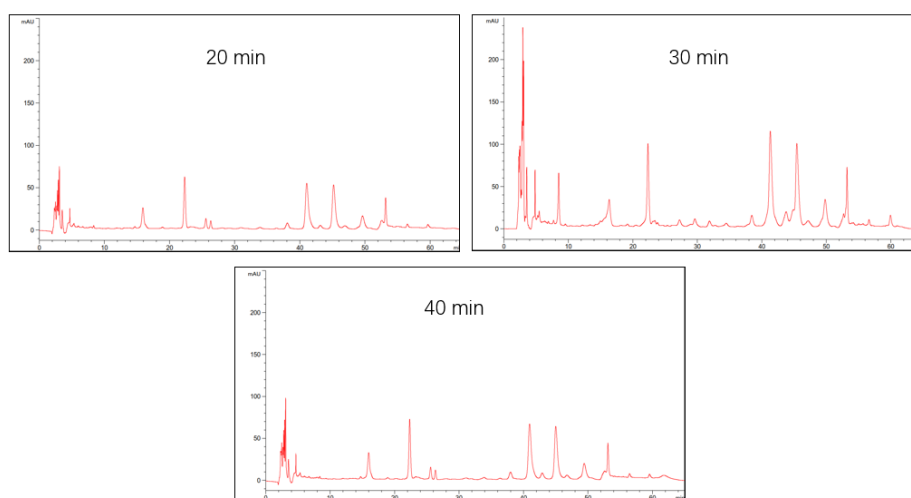

Figure S2. Chromatograms of different extraction time.

**Study on ratios of material to liquid.** The same batch of Fuzi were extracted with three ratios of material to liquid (1:25, 1:35, and 1:50). All operations were the same except for the

ratio of material to liquid. The extract was determined with the chromatographic conditions of Fuzi in Chinese Pharmacopoeia. There was little difference among three groups, so the ratio of material to liquid (1:25) was selected according to the principle of saving.

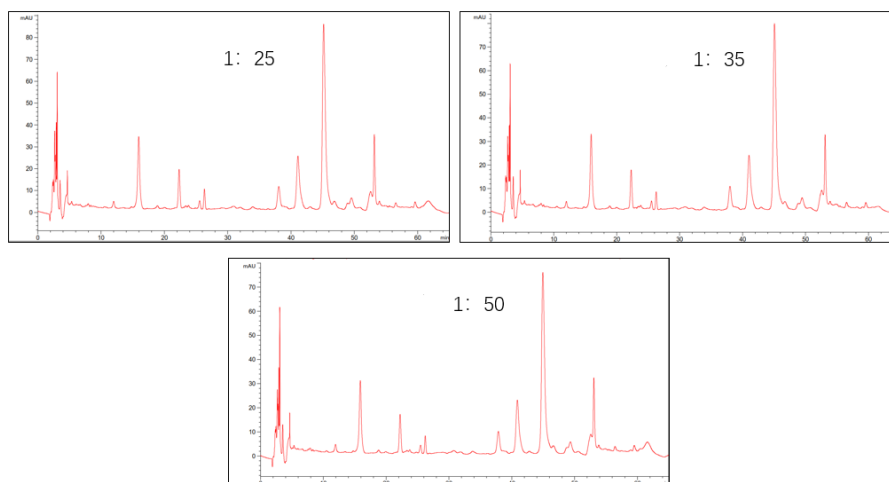

**Figure S3.** Chromatograms of different ratios of material to liquid.

**Table S1.** Six representative alkaloids contents of Fuzi from Jiangyou, Butuo, and Yunnan.

| Sample | Benzoylmesaconine % | Benzoylaconine % | Benzoylhypaconine % | Mesaconitine % | Hypaconitine % | Aconitine % |
|--------|---------------------|------------------|---------------------|----------------|----------------|-------------|
| JY-1   | 0.0225              | —                | 0.0059              | 0.0330         | 0.0840         | 0.0037      |
| JY-2   | 0.0378              | 0.0037           | 0.0039              | 0.0564         | 0.0524         | 0.0093      |
| JY-3   | 0.0295              | —                | 0.0041              | 0.0422         | 0.0624         | 0.0061      |
| JY-4   | 0.0224              | 0.0029           | 0.0069              | 0.0275         | 0.0898         | 0.0062      |
| JY-5   | 0.0208              | —                | 0.0052              | 0.0277         | 0.0782         | 0.0038      |
| JY-6   | 0.0280              | —                | 0.0049              | 0.0373         | 0.0734         | 0.0058      |
| JY-7   | 0.0447              | 0.0060           | 0.0051              | 0.0646         | 0.0605         | 0.0219      |
| JY-8   | 0.0391              | 0.0034           | 0.0052              | 0.0560         | 0.0673         | 0.0115      |
| BT-1   | 0.0202              | —                | —                   | 0.0940         | 0.0627         | 0.0084      |
| BT-2   | 0.0153              | —                | —                   | 0.0722         | 0.0393         | 0.0097      |
| BT-3   | 0.0134              | —                | —                   | 0.0638         | 0.0632         | 0.0060      |
| BT-4   | 0.0062              | —                | —                   | 0.0379         | 0.0240         | 0.0053      |
| BT-5   | 0.0171              | —                | —                   | 0.0966         | 0.0500         | 0.0141      |
| BT-6   | 0.0141              | —                | —                   | 0.0681         | 0.0263         | 0.0100      |
| BT-7   | 0.0306              | —                | —                   | 0.1612         | 0.0485         | 0.0203      |
| BT-8   | 0.0240              | —                | —                   | 0.1309         | 0.0494         | 0.0136      |
| BT-9   | 0.0203              | —                | —                   | 0.0915         | 0.0521         | 0.0127      |
| BT-10  | 0.0262              | —                | —                   | 0.1383         | 0.0464         | 0.0203      |
| BT-11  | 0.0385              | —                | —                   | 0.1752         | 0.0332         | 0.0236      |
| BT-12  | 0.0193              | —                | —                   | 0.1022         | 0.0560         | 0.0143      |
| YN-1   | 0.0236              | —                | —                   | 0.1344         | 0.0153         | 0.0146      |
| YN-2   | 0.0205              | —                | —                   | 0.1468         | 0.0217         | 0.0163      |
| YN-3   | 0.0211              | —                | —                   | 0.1333         | 0.0237         | 0.0142      |
| YN-4   | 0.0253              | —                | —                   | 0.1728         | 0.0093         | 0.0226      |
| YN-5   | 0.0252              | —                | —                   | 0.1691         | 0.0093         | 0.0221      |
| YN-6   | 0.0358              | —                | —                   | 0.2267         | 0.0108         | 0.0268      |
| YN-7   | 0.0178              | —                | —                   | 0.1619         | 0.0112         | 0.0192      |
| YN-8   | 0.0074              | —                | —                   | 0.0334         | 0.0232         | 0.0017      |
| YN-9   | 0.0172              | —                | —                   | 0.1472         | 0.0106         | 0.0195      |
| YN-10  | 0.0276              | —                | —                   | 0.2021         | 0.0161         | 0.0326      |
| YN-11  | 0.0231              | —                | —                   | 0.1663         | 0.0132         | 0.0263      |
| YN-12  | 0.0154              | —                | —                   | 0.0998         | 0.0086         | —           |

**Table S2.** Similarity results of HPLC fingerprint of Fuzi from Jiangyou, Butuo, and Yunnan.

|      | JY-1  | JY-2  | JY-3  | JY-4  | JY-5  | JY-6  | JY-7 | JY-8 | BT-1 | BT-2 | BT-3 | BT-4 | BT-5 | BT-6 | BT-7 | BT-8 | BT-9 | BT-10 | BT-11 | BT-12 | YN-1 | YN-2 | YN-3 | YN-4 | YN-5 | YN-6 | YN-7 | YN-8 | YN-9 | YN-10 | YN-11 | YN-12 | R |  |
|------|-------|-------|-------|-------|-------|-------|------|------|------|------|------|------|------|------|------|------|------|-------|-------|-------|------|------|------|------|------|------|------|------|------|-------|-------|-------|---|--|
| JY-1 | 1     |       |       |       |       |       |      |      |      |      |      |      |      |      |      |      |      |       |       |       |      |      |      |      |      |      |      |      |      |       |       |       |   |  |
| JY-2 | 0.901 | 1     |       |       |       |       |      |      |      |      |      |      |      |      |      |      |      |       |       |       |      |      |      |      |      |      |      |      |      |       |       |       |   |  |
| JY-3 | 0.947 | 0.815 | 1     |       |       |       |      |      |      |      |      |      |      |      |      |      |      |       |       |       |      |      |      |      |      |      |      |      |      |       |       |       |   |  |
| JY-4 | 0.968 | 0.845 | 0.964 | 1     |       |       |      |      |      |      |      |      |      |      |      |      |      |       |       |       |      |      |      |      |      |      |      |      |      |       |       |       |   |  |
| JY-5 | 0.986 | 0.904 | 0.917 | 0.942 | 1     |       |      |      |      |      |      |      |      |      |      |      |      |       |       |       |      |      |      |      |      |      |      |      |      |       |       |       |   |  |
| JY-6 | 0.949 | 0.895 | 0.947 | 0.935 | 0.932 | 1     |      |      |      |      |      |      |      |      |      |      |      |       |       |       |      |      |      |      |      |      |      |      |      |       |       |       |   |  |
| JY-7 | 0.886 | 0.984 | 0.8   | 0.839 | 0.892 | 0.892 | 1    |      |      |      |      |      |      |      |      |      |      |       |       |       |      |      |      |      |      |      |      |      |      |       |       |       |   |  |







|       |       |       |       |       |       |       |       |
|-------|-------|-------|-------|-------|-------|-------|-------|
| 0.466 | 0.456 | 0.459 | 0.752 | 0.451 | 0.435 | 0.442 | 0.436 |
| 0.72  | 0.698 | 0.716 | 0.834 | 0.694 | 0.702 | 0.702 | 0.685 |
| 0.362 | 0.376 | 0.359 | 0.742 | 0.354 | 0.335 | 0.344 | 0.354 |
| 0.382 | 0.388 | 0.378 | 0.738 | 0.374 | 0.356 | 0.363 | 0.367 |
| 0.457 | 0.43  | 0.447 | 0.737 | 0.429 | 0.418 | 0.422 | 0.407 |
| 0.523 | 0.523 | 0.516 | 0.858 | 0.506 | 0.497 | 0.502 | 0.502 |
| 0.746 | 0.723 | 0.735 | 0.853 | 0.719 | 0.715 | 0.722 | 0.707 |
| 0.683 | 0.659 | 0.672 | 0.834 | 0.655 | 0.65  | 0.655 | 0.641 |
| 0.813 | 0.818 | 0.811 | 0.942 | 0.811 | 0.798 | 0.803 | 0.804 |
| 0.895 | 0.885 | 0.893 | 0.911 | 0.885 | 0.876 | 0.885 | 0.877 |
| 0.744 | 0.736 | 0.745 | 0.881 | 0.734 | 0.726 | 0.73  | 0.722 |
| 0.864 | 0.835 | 0.866 | 0.88  | 0.84  | 0.843 | 0.847 | 0.826 |
| 0.904 | 0.893 | 0.9   | 0.889 | 0.896 | 0.882 | 0.891 | 0.883 |
| 0.944 | 0.926 | 0.942 | 0.873 | 0.931 | 0.926 | 0.934 | 0.92  |
| 0.961 | 0.959 | 0.959 | 0.861 | 0.961 | 0.945 | 0.959 | 0.954 |
| 0.926 | 0.932 | 0.927 | 0.903 | 0.929 | 0.916 | 0.925 | 0.926 |
| 0.887 | 0.881 | 0.889 | 0.898 | 0.879 | 0.875 | 0.88  | 0.872 |
| 0.926 | 0.93  | 0.925 | 0.912 | 0.928 | 0.917 | 0.925 | 0.925 |
| 0.958 | 0.963 | 0.958 | 0.864 | 0.961 | 0.956 | 0.962 | 0.962 |
| 0.901 | 0.884 | 0.897 | 0.892 | 0.889 | 0.875 | 0.886 | 0.874 |
| 0.967 | 0.97  | 0.968 | 0.848 | 0.97  | 0.966 | 0.97  | 0.97  |
| 0.992 | 0.98  | 0.992 | 0.811 | 0.987 | 0.981 | 0.989 | 0.98  |
| 0.978 | 0.961 | 0.974 | 0.815 | 0.97  | 0.966 | 0.971 | 0.96  |
| 0.985 | 0.998 | 0.987 | 0.761 | 0.989 | 0.981 | 0.992 | 1     |
| 0.995 | 0.989 | 0.997 | 0.764 | 0.995 | 0.991 | 1     |       |
| 0.985 | 0.978 | 0.992 | 0.756 | 0.982 | 1     |       |       |
| 0.993 | 0.987 | 0.992 | 0.766 | 1     |       |       |       |
| 0.776 | 0.771 | 0.774 | 1     |       |       |       |       |
| 0.996 | 0.985 | 1     |       |       |       |       |       |
| 0.985 | 1     |       |       |       |       |       |       |
| 1     |       |       |       |       |       |       |       |
|       |       |       |       |       |       |       |       |
|       |       |       |       |       |       |       |       |
|       |       |       |       |       |       |       |       |

| R     | Y<br>Z<br>12 |
|-------|--------------|
| 0.722 | 0.476        |
| 0.885 | 0.736        |
| 0.637 | 0.369        |
| 0.657 | 0.388        |
| 0.703 | 0.473        |
| 0.763 | 0.533        |
| 0.9   | 0.76         |
| 0.866 | 0.697        |
| 0.955 | 0.813        |
| 0.985 | 0.899        |
| 0.914 | 0.749        |
| 0.954 | 0.879        |
| 0.988 | 0.905        |
| 0.99  | 0.951        |
| 0.991 | 0.959        |
| 0.992 | 0.922        |
| 0.985 | 0.89         |
| 0.98  | 0.921        |
| 0.964 | 0.952        |
| 0.985 | 0.906        |
| 0.95  | 0.961        |
| 0.966 | 0.991        |
| 0.963 | 0.978        |
| 0.93  | 0.977        |
| 0.936 | 0.991        |
| 0.929 | 0.98         |
| 0.937 | 0.987        |
| 0.9   | 0.782        |
| 0.942 | 0.994        |
| 0.937 | 0.978        |
| 0.943 | 0.998        |
| 0.944 | 1            |
| 1     |              |
